# Supplementary material for: Global trends and disparities in burden of blindness and vision loss caused by non-communicable diseases from 1990 to 2021, and forecasts to 2045: a systematic analysis for the global burden of disease study 2021
Source: Front Med (Lausanne). 2025 Jun 19;12:1561568. doi: 10.3389/fmed.2025.1561568 (PMC12222054; doi:10.3389/fmed.2025.1561568)
Supplement: Supplementary file 1 [file Table_1.xlsx]

## Sheet: Supplementary Table 1
Supplementary Table 1 YLDs of blindness and vision loss caused by NCDs in 1990 and 2021 by GBD 2021 super regions.
GBD 2021 Super Regions	YLDs
	All-ages number		Age-standardized rate		AAPC of number (%)	AAPC of rate (%)
	(×1000, 95%UI)		(/100000, 95% UI)
	1990	2021	1990	2021
Global	15379.40(10402.71,22127.26)	31573.50(20473.27,46732.34)	370.10(252.50,534.00)	371.10(241.20,547.70)	3.39668	0.00811439
Gender
Male	6870.60(4627.83,9923.00)	13952.50(8970.20,20760.28)	355.40(242.70,509.40)	344.90(223.90,510.30)	3.32497	-0.0944222
Female	8508.80(5769.09,12257.79)	17621.10(11485.85,25974.36)	385.10(262.40,554.60)	395.30(256.80,584.00)	3.45459	0.0853402
SDI grouping levels
High SDI	1831.90(1180.29,2756.23)	3039.00(1947.49,4636.43)	179.30(114.50,268.60)	178.70(111.30,272.30)	2.1256	-0.0117107
High-middle SDI	3002.20(2007.19,4423.08)	5814.30(3652.84,8900.02)	305.60(206.00,448.10)	317.00(198.90,485.80)	3.02145	0.120159
Middle SDI	4919.60(3322.48,7070.15)	11420.70(7367.33,16939.65)	449.20(308.60,641.50)	429.70(280.50,632.00)	4.26284	-0.140325
Low-middle SDI	4233.00(2912.50,6020.23)	8305.40(5477.29,12049.87)	658.90(461.70,920.70)	554.40(375.20,795.60)	3.10338	-0.511447
Low SDI	1380.40(938.11,1964.36)	2974.40(1951.63,4315.77)	568.70(400.20,798.40)	513.20(349.20,730.10)	3.7249	-0.314734
Health system grouping levels
Advanced Health System	3321.80(2170.73,4928.16)	4870.80(3159.26,7339.52)	217.30(141.50,322.50)	205.10(129.90,310.80)	1.50424	-0.180853
Basic Health System	6021.60(4051.55,8677.60)	13560.00(8677.06,20490.99)	386.90(264.80,558.40)	372.30(240.50,555.30)	4.03837	-0.121519
Limited Health System	5737.80(3953.76,8152.08)	12487.10(8158.43,18143.30)	692.60(486.00,963.90)	596.90(401.40,856.60)	3.79449	-0.445705
Minimal Health System	285.90(188.44,422.39)	635.70(410.81,960.28)	431.10(291.50,613.10)	410.80(278.10,589.70)	3.94732	-0.152169
High income
High-income Asia Pacific	345.70(216.38,524.23)	570.20(370.19,863.89)	179.00(112.50,267.30)	166.70(103.20,253.80)	2.09502	-0.221706
Western Europe	1060.10(715.76,1572.56)	1448.90(975.96,2174.34)	208.10(138.80,307.00)	191.30(124.60,287.00)	1.18313	-0.260269
Australasia	38.30(23.92,58.48)	72.90(46.13,110.75)	174.90(109.20,265.90)	167.30(103.50,253.40)	2.91898	-0.139426
High-income North America	463.10(294.23,698.86)	782.70(495.63,1180.01)	144.60(90.70,218.70)	148.40(92.50,227.50)	2.22609	0.0844783
Southern Latin America	110.10(72.11,163.25)	174.30(112.27,260.40)	237.40(156.20,352.20)	216.20(137.60,323.00)	1.88007	-0.288324
Central Europe, Eastern Europe and Central Asia
Central Europe	262.30(170.28,397.74)	337.50(218.73,520.40)	186.40(121.50,280.20)	173.70(110.40,265.30)	0.924446	-0.218799
Eastern Europe	882.10(570.46,1316.34)	1058.10(658.14,1642.61)	335.60(217.90,499.00)	335.80(205.90,524.30)	0.643872	0.00238854
Central Asia	172.20(117.21,251.60)	259.50(172.51,384.19)	353.40(242.90,516.50)	317.50(214.70,469.50)	1.63568	-0.327328
Latin America and Caribbean
Tropical Latin America	547.00(364.57,797.66)	1125.20(742.44,1666.00)	523.60(354.20,754.70)	448.60(297.60,662.50)	3.4092	-0.462521
Central Latin America	431.80(293.78,625.01)	964.20(637.52,1425.18)	444.00(306.00,634.60)	382.50(255.90,560.40)	3.97749	-0.44657
Andean Latin America	123.20(83.30,178.96)	262.40(172.16,389.77)	530.20(360.60,770.90)	429.60(284.80,638.10)	3.6472	-0.612325
Caribbean	103.80(69.78,151.58)	172.30(113.75,256.14)	374.50(253.00,550.70)	327.60(215.30,486.50)	2.12945	-0.404556
Southeast Asia, East Asia, and Oceania
East Asia	2798.80(1855.75,4140.68)	7107.30(4360.08,11236.53)	315.80(213.90,461.50)	341.30(212.00,532.40)	4.96579	0.260847
Southeast Asia	1322.30(906.36,1893.56)	2544.80(1717.86,3721.59)	491.30(342.70,693.20)	394.50(270.70,572.30)	2.98249	-0.635541
Oceania	14.60(9.80,21.23)	33.40(22.06,49.67)	454.40(311.80,653.40)	409.40(276.80,600.60)	4.14381	-0.31951
North Africa and Middle East
North Africa and Middle East	972.30(670.64,1375.48)	2051.00(1384.38,2994.00)	512.60(360.90,724.80)	426.40(292.40,616.10)	3.5788	-0.542087
South Asia
South Asia	4562.10(3160.54,6461.45)	10070.00(6546.06,14714.13)	766.60(538.40,1064.20)	656.70(436.10,949.40)	3.89454	-0.462623
Sub-Saharan Africa
Southern Sub-Saharan Africa	182.10(113.32,282.42)	336.30(203.43,535.53)	563.70(368.60,840.40)	516.40(323.20,788.90)	2.7317	-0.270969
Eastern Sub-Saharan Africa	385.50(262.13,543.50)	810.40(545.56,1158.43)	458.00(321.80,642.30)	407.10(281.90,578.10)	3.55544	-0.358836
Central Sub-Saharan Africa	102.50(59.81,172.37)	258.20(148.60,436.62)	360.40(216.80,571.70)	347.00(206.80,557.80)	4.90064	-0.11987
Western Sub-Saharan Africa	499.60(338.34,716.23)	1134.00(752.82,1657.54)	513.80(358.70,732.60)	485.20(335.50,696.40)	4.0959	-0.179714
YLDs, years lived with disability; NCDs, non-communicable diseases; AAPC, average annual percent of change.
